# Supplementary material
Source: MDPI journal article supplement (https://www.mdpi.com/2312-7481/3/3/29)
Supplement: s1 [file s1]

Supplementary Materials: Low Field NMR Determination of pKa Values for Hydrophilic Drugs for Students in Medicinal Chemistry

Aleksandra Zivkovic, Jan Josef Bandolik, Alexander Jan Skerhut, Christina Coesfeld, Miomir Raos, Nenad Zivkovic, Vlastimir Nikolic and Holger Stark

1. Useful Hints for Advisers

There is no need to add an internal standard

We use partly deuterated water in order to reduce signal of the water but this is not a requirement. It is necessary that the prepared amount of the drug is completely in solution before you start adjusting the p*H* of the sample solution.

To analyze the prepared samples in low frequency NMR spectrometer you should use about 0.6 mL and choose 1D Protocol with following characteristics:

- Acquisition bandwidth: 5kHz (117 ppm)
- 90 pulse width: 7 microseconds
- Dwell time: 200 microseconds
- Number of points: 32,768
- Acquisition time: 6.554 seconds
- Repetition time: 15 seconds

In order to interpret the acquired data, we use MNOVA 10.0.2 and both the automatic phase and baseline correction. For Software, our students use the software Manual available.

There are two possibilities to do data analysis that are explained in detail in the student instructions. If you are working with the undergraduate students that do not have a lot experience with Microsoft Excel we suggest graphical (Tubb´s method) p*Ka* determination from the obtained data is used. After plotting your data, chemical shift versus p*H*, to obtain the titration curve you can obtain the p*Ka* value out of it employing simple circle method for determination of the equivalence point. The data obtained in this simple way do not differ significantly from the data obtained in the previously described method. Another possibility is that after calculating the p*Ka* for every pH value in the table, you search for regions where the chemical shift is rapidly changing with the pH change (sloe of the titration curve). The p*Ka* value of the compound is calculated as the mean value of those calculations

The Tables obtained in the measurements as well as the stacked NMRs are enclosed to this instructor guideline.

2. Equipment

Magritek NMR spectrometer (42.5 MHz) (Magritek, Aachen, Germany) , NMR tubes, milligram balance, disposable pipets, ultrasonic bath; The measurement used is 1D PROTON Powerscan measurement using a single 90 degree excitation pulse. This protocol uses these pulse sequence parameters:

- Acquisition bandwidth: 5kHz (117 ppm)
- 90 pulse width: 7 microseconds
- Dwell time: 200 microseconds
- Number of points : 32,768
- Acquisition time: 6.554 seconds
- Repetition time: 15 seconds

3. Reagents

- Deuterium oxide – CAS: 7789-20-0
- Concentrated hydrochloride acid- CAS: 7647-01-0
- Potassium hydroxide- CAS: 1310-58-3
- Nicotinamide- CAS: 98-92-0
- Isoniazid- CAS: 54-85-3
- Pyridoxine hydrochloride- CAS: 58-56-0

4. Hazards

Appropriate safety equipment (laboratory coat, safety gloves and glasses) should be used by students at all times. Concentrated hydrochloric acid is corrosive and should be handled in the fume hood. Potassium hydroxide is caustic. Isoniazid is very hazardous in case of ingestion, slightly hazardous in case of skin contact, eye contact (irritant) or inhalation. Pyridoxine hydrochloride is very hazardous in case of eye contact, hazardous in case of skin contact and ingestion. Nicotinamide is hazardous in case of eye contact, of ingestion, or inhalation and slightly hazardous in case of skin contact.

All the solutions are collected in properly labeled containers that can be disposed according to the directives in our institution.

5. First Lab Period

Guided through group leader the group should read the following publications and discuss them:

a) Handloser C.S., Chakrabarty M.R., Mosher M.W., Experimental Determination of P*Ka* Values by Use of NMR Chemical Shifts, *J. Chem. Educ.,* **1973***, 50,* 510-511*. b)* Gift A.D., Stewart S.M., Bokashanga P.K. Experimental Determination of p*Ka* Values by Use of NMR Chemical Shifts, Revisited, *J. Chem. Educ.*, **2012**, *89 (11)*, 1458–1460;

(1) Search the drugs in Eu. Ph. To which the same approach (considering the structure similarity) can be applied.

(2) Discuss importance of the acidity/basicity and pKa values in terms of ADME and application of the drugs.

(3) Cross-reference this structures with the structures available in our lab.

(4) Choose which one of your hits you want to use for the experiment.

6. Second Lab Period

Procedure

1. Weight 75-100 mg of your sample in a glass vial and add 5.0 mL D2O to dissolve the drug that needs to be analysed.
2. Prepare the two HCl solutions (1.0 M and 0.1 M).
3. For the 1.0 M solution add 0.2 mL (or 6 drops) of concentrated HCl to a test tube and then add 2.2 mL of D2O.
4. To prepare the 0.1 M solution add 0.1 mL (or 3 drops) of the prepared 1.0 M solution to a test tube and add 0.9 mL of D2O.
5. Prepare the two KOH solutions (1.0 M and 0.1 M)
6. For the 1.0 M solution add 112 mg of KOH in a glass vial and add 2.0 ml of D2O.
7. To prepare the 0.1 M solution add 0.1 mL (3 drops) of the prepared 1.0 M solution and add 0.9 mL of D2O.
8. Adjust the pH of the sample solution by adding the HCl or KOH. The NMR spectra should be collected every 0.5 p*H* units if the chemical shift is rapidly changing and every 1.0 to 2.0 pH units if the chemical shift is constant.
9. Add 0.6 mL of the pH adjusted sample solution in a NMR tube and put it into the NMR spectrometer.
10. Start the measuring process. The simple proton measurement of 1min. is enough for the determination.

7. Data analysis

To determine p*Ka* value out of your gathered data, you use analytical chemistry software MNOVA 10.0.2. Right at the beginning check if the HDO peak is locked properly as reference with a value given in literature. In the next step you should use both the automatic phase and baseline correction, which are implemented in the used software. Identify the peaks/peak you want to use for the determination. You need to determine the chemical shift of the same peak in each measurement and to write it down in the Chart S1 show here. The chart should be done as a spreadsheet in Excel using the following equation with formula (already shown in the article) (S1-S3):

(S1)

(S2)

(S3)

**Chart S1.** Chart to be used in MS Excel to calculate the data.

| **p*H* value** | **Chemical shift [ppm]** | **pB** | **pBH+** | **p*Ka* value** |
| --- | --- | --- | --- | --- |
|  |  |  |  |  |
|  |  |  |  |  |
|  |  |  |  |  |
|  |  |  |  |  |

After calculating the p*Ka* for every pH value in the table, you should search for regions where the chemical shift is rapidly changing with the pH change (slope of the titration curve). p*Ka* of the compound is calculated as the mean value of those calculations.

Alternative data analysis method

After plotting your data, chemical shift versus pH, to obtain the titration curve you can obtain the p*K*a value out of it employing simple concentric arcs method (Tubbs method) for determination of the equivalence point. The data obtained in this simple do not differ significantly from the data obtained in the previously described method.

8. Third Lab period

1. Create an account for the web-based literature search programs : [www.reaxys.com](http://www.reaxys.com) and [www.scifinder.org](http://www.scifinder.org) ( follow university instructions for free access)
2. Search for the structure you obtained and the p*Ka* values in the literature.
3. Download the original publications and introduce yourself to the relevant data.
4. Go to the web page: ACE and JChem acidity and basicity calculator, <https://epoch.uky.edu/ace/public/pKa.jsp> and calculate the predicted p*Ka* value.
5. Discuss obtained data and compare them with the literature and computational method.

Pre Lab Questions:

1. What is the pH (pH*, pD) value and how is it calculated?
2. What is an acid or a base in detail and which theories are known?
3. In which way is the p*Ka* value defined? What is the meaning of high and low p*Ka*-values?
4. How does the pH influence the 1H NMR chemical shifts and why this can be used as the basis for the determination of the p*Ka*?

9. NMR Data and Example Tables of the Drugs Used

Nicotinamide

1. 1H NMR – aromatic region, marked peak was used for p*K*a value determination (Figure S1).


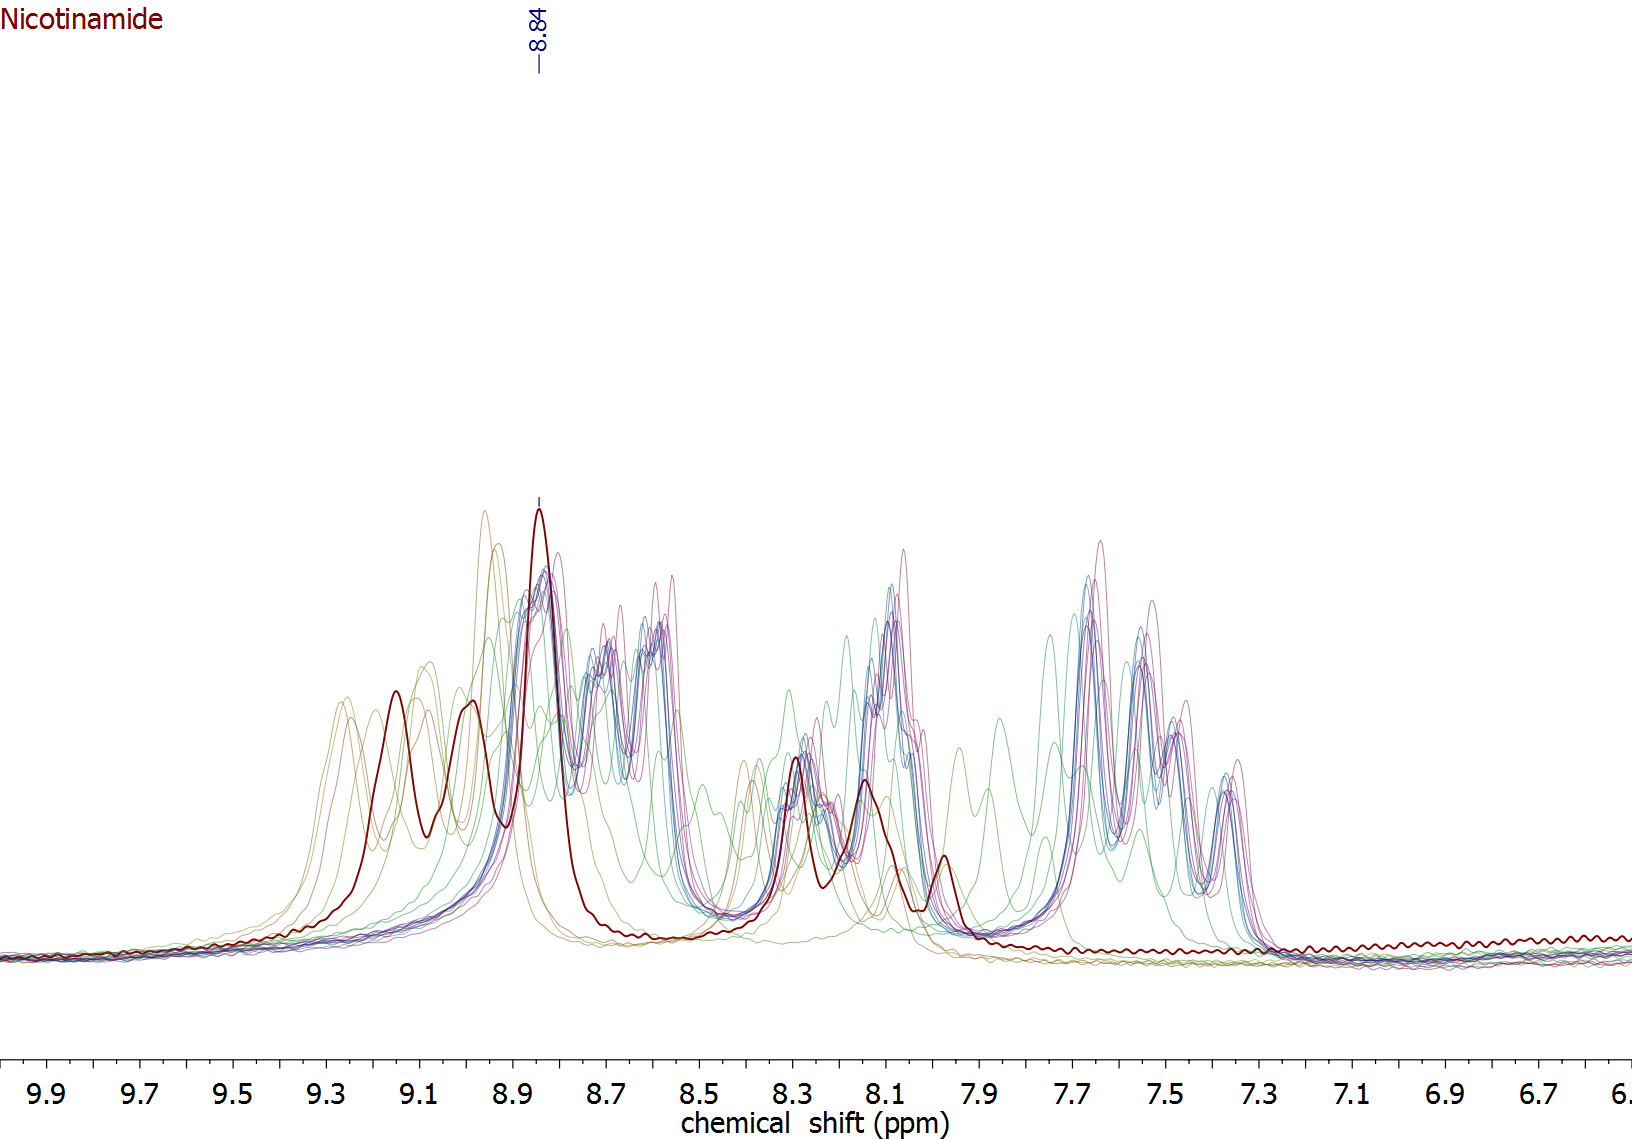


**Figure S1.** 1H NMR data of Nicotinamide (extraction).

1. Table with chemical shifts and p*K*a values (Table S1).

**Table S1.** Chemical shifts and p*K*a values from Nicotinamid determination.

| **p*H*-Value** | **Chemical Shift [ppm]** | **xB** | **xBH+** | **p*K*a** |
| --- | --- | --- | --- | --- |
| 12,56 | 8,8035 | 1,000 | 0,000 | # |
| 11,30 | 8,8175 | 0,970 | 0,030 | 9,79 |
| 10,17 | 8,8135 | 0,979 | 0,021 | 8,51 |
| 9,24 | 8,8210 | 0,962 | 0,038 | 7,83 |
| 8,18 | 8,8306 | 0,942 | 0,058 | 6,97 |
| 7,63 | 8,8380 | 0,926 | 0,074 | 6,53 |
| 6,98 | 8,8285 | 0,946 | 0,054 | 5,73 |
| 6,30 | 8,8344 | 0,934 | 0,066 | 5,15 |
| 5,42 | 8,8349 | 0,933 | 0,067 | 4,28 |
| 4,75 | 8,8514 | 0,897 | 0,103 | 3,81 |
| 4,28 | 8,8856 | 0,824 | 0,176 | 3,61 |
| 3,76 | 8,9522 | 0,680 | 0,320 | 3,43 |
| 3,26 | 9,0777 | 0,411 | 0,589 | 3,42 |
| 2,67 | 9,1940 | 0,161 | 0,839 | 3,39 |
| 2,19 | 9,2552 | 0,029 | 0,971 | 3,71 |
| 1,68 | 9,2689 | 0,000 | 1,000 | # |
| 1,06 | 9,2672 | 0,004 | 0,996 | 3,50 |
| 0,60 | 9,2670 | 0,004 | 0,996 | 2,99 |

Values of the pH where the chemical shift is rapidly changing are: 2.67, 3.26 and 3.76 and the corresponding calculated p*Ka* values are: 3.39, 3.42 and 3.43. The average of this values is 3.41 and corresponds to the p*Ka* value students also determined graphically (3.41).

1. Titration curve (Figure S2)

**Figure S2.** Titration curve of Nicotinamide.

Pyridoxine hydrochloride

1. 1H NMR – aromatic region, marked peak was used for p*K*a value determination (Figure S3 and S4).

**Figure S3.** 1H NMR data of Pyridoxine hydrochloride


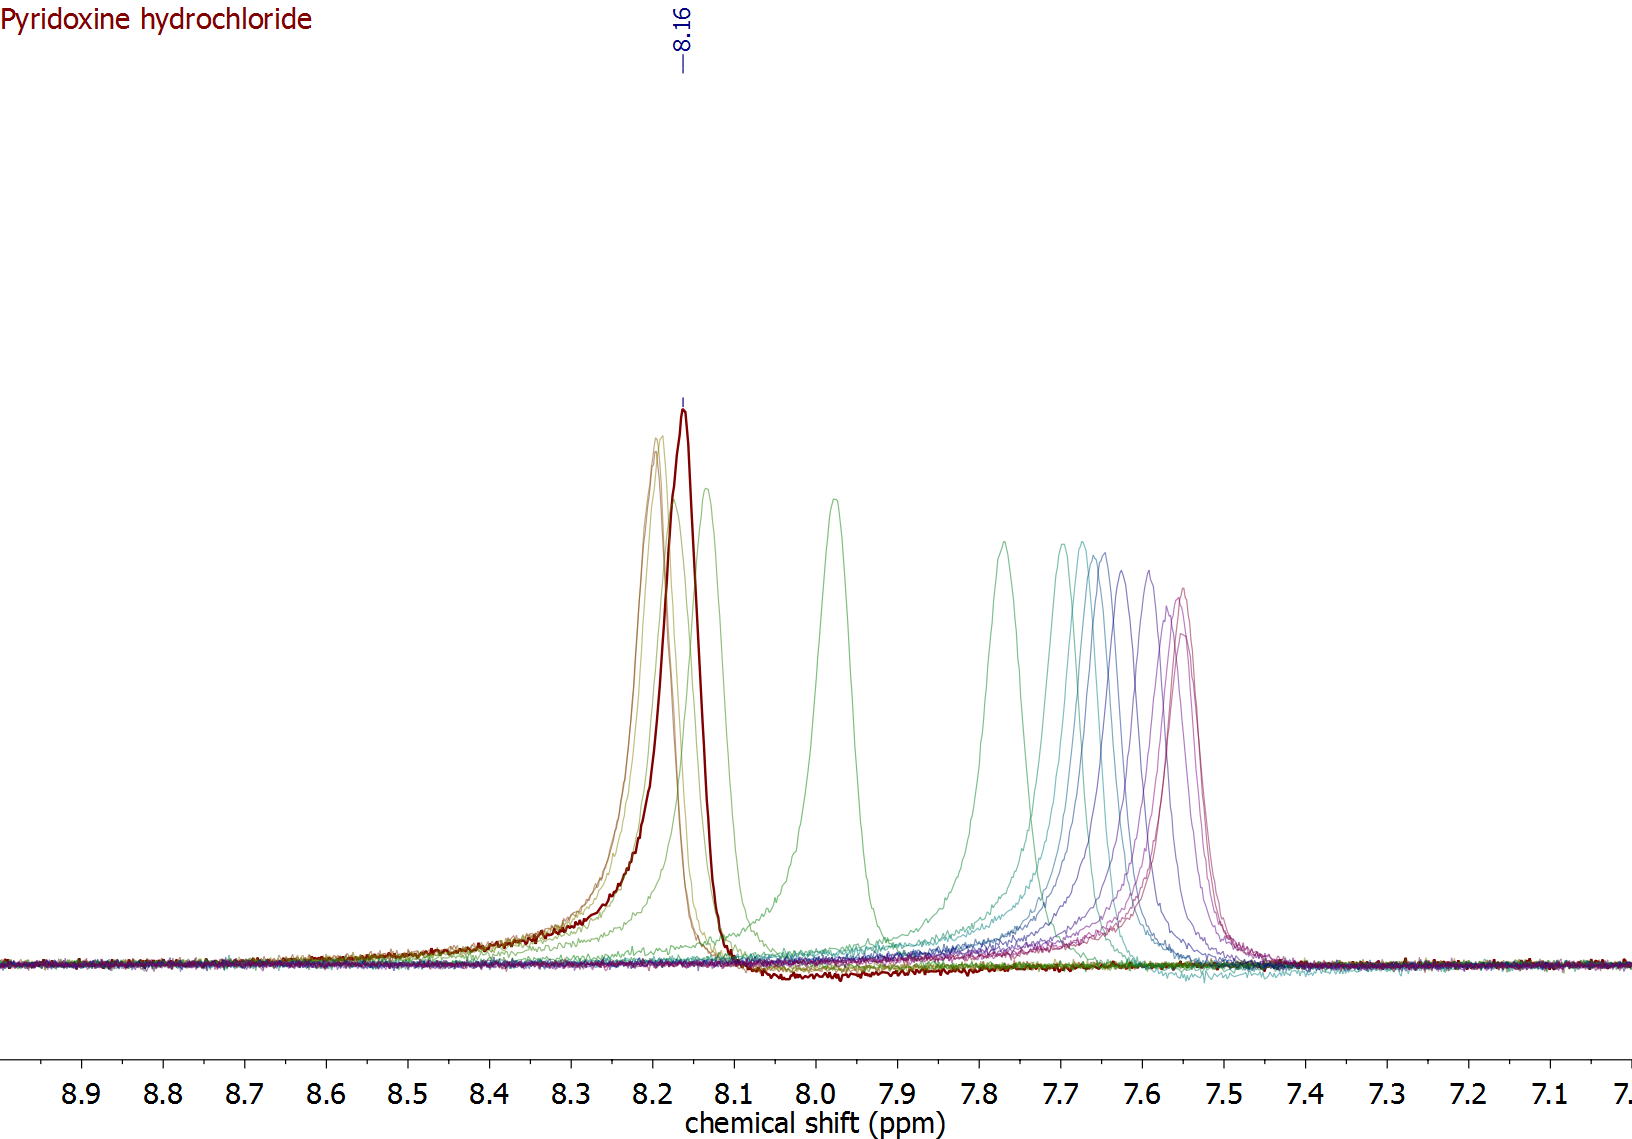


**Figure S4.** 1H NMR data of Pyridoxine hydrochloride (extraction).

1. Table with chemical shifts and p*ka* values (Table S2)

**Table S2.** Chemical shifts and p*K*a values from Pyridoxine hydrochloried determination.

| **pH-Value** | **Chemical Shift [ppm]** | **xB** | **xBH+** | **p*K*a** |
| --- | --- | --- | --- | --- |
| 2,01 | 8,1965 | 0,000 | 1,000 | # |
| 2,53 | 8,1960 | 0,001 | 0,999 | 5,64 |
| 3,26 | 8,1889 | 0,012 | 0,988 | 5,18 |
| 3,66 | 8,1741 | 0,035 | 0,965 | 5,11 |
| 4,15 | 8,1343 | 0,096 | 0,904 | 5,12 |
| 4,88 | 7,9780 | 0,338 | 0,662 | 5,17 |
| 5,69 | 7,7691 | 0,661 | 0,339 | 5,40 |
| 6,34 | 7,6971 | 0,772 | 0,228 | 5,81 |
| 7,06 | 7,6600 | 0,830 | 0,170 | 6,37 |
| 7,53 | 7,6500 | 0,845 | 0,155 | 6,79 |
| 8,19 | 7,6300 | 0,876 | 0,124 | 7,34 |
| 8,59 | 7,6200 | 0,892 | 0,108 | 7,67 |
| 9,15 | 7,6000 | 0,923 | 0,077 | 8,07 |
| 9,63 | 7,5950 | 0,930 | 0,070 | 8,50 |
| 10,56 | 7,5700 | 0,969 | 0,031 | 9,06 |
| 11,37 | 7,5525 | 0,996 | 0,004 | 8,96 |
| 12,22 | 7,5500 | 1,000 | 0,000 | # |

Values of the pH where the chemical shift is rapidly changing are: 4.15, 4.88 and 5.69 and the corresponding calculated p*Ka* values are: 5.12, 5.17 and 5.40. The average of this values is 5.23 and corresponds to the p*Ka* value students also determined graphically (5.23).

1. Titration curve (Figure S5)

**Figure S5.** Titration curve of Pyridoxine hydrochloride

Isoniazid

1. 1H NMR –aromatic region, marked peak was used for p*K*a value determination (Figure S6).


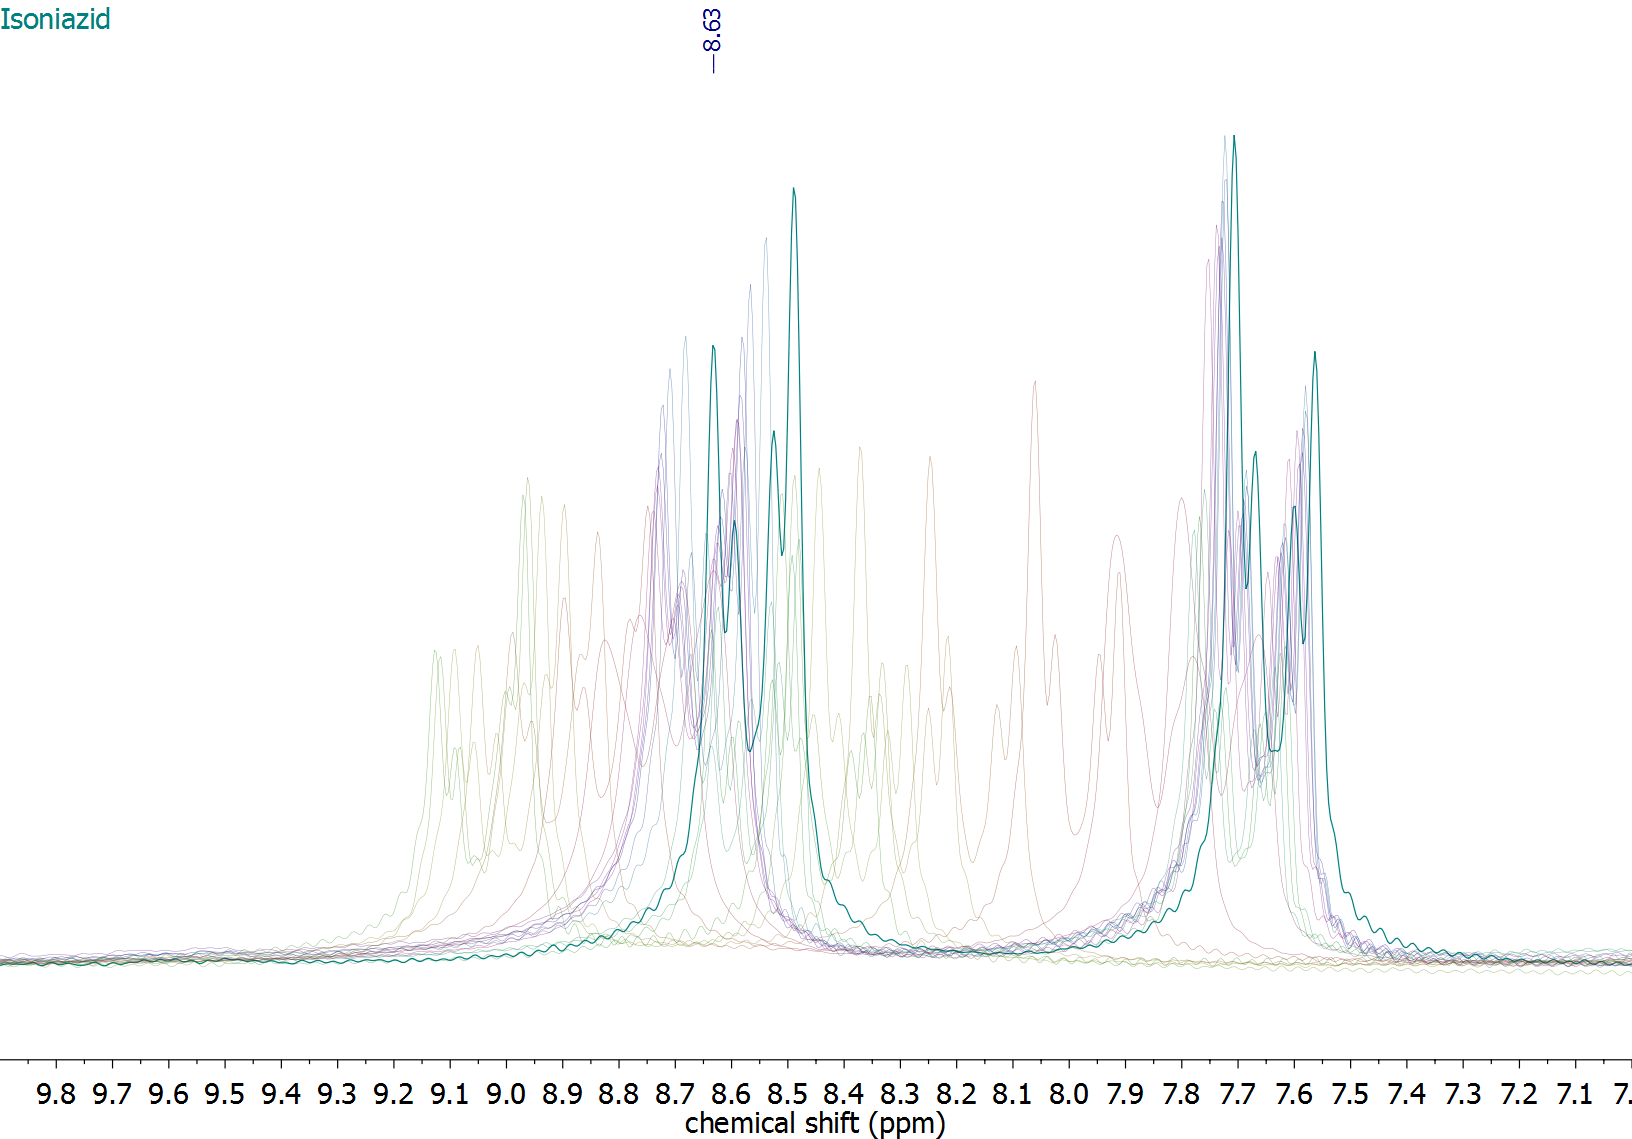


**Figure S6.** 1H NMR data of Isoniazid (extraction).

1. Table with chemical shifts and p*Ka* values (Table S3)

**Table S3.** Chemical shifts and p*K*a values from Isoniazid detemination.

| **pH-Value** | **Chemical Shift [ppm]** | **xB** | **xBH+** | **p*K*a** |
| --- | --- | --- | --- | --- |
| 12,90 | 8,6242 | 1,000 | 0,000 | # |
| 12,18 | 8,6359 | 0,977 | 0,023 | 10,56 |
| 11,40 | 8,6729 | 0,903 | 0,097 | 10,43 |
| 10,66 | 8,6821 | 0,885 | 0,115 | 9,77 |
| 9,95 | 8,7093 | 0,831 | 0,169 | 9,26 |
| 8,68 | 8,7229 | 0,804 | 0,196 | 8,07 |
| 7,46 | 8,7254 | 0,799 | 0,201 | 6,86 |
| 6,66 | 8,7309 | 0,788 | 0,212 | 6,09 |
| 5,80 | 8,7319 | 0,786 | 0,214 | 5,24 |
| 5,16 | 8,7393 | 0,771 | 0,229 | 4,63 |
| 4,65 | 8,7629 | 0,724 | 0,276 | 4,23 |
| 4,13 | 8,8250 | 0,600 | 0,400 | 3,95 |
| 3,74 | 8,8973 | 0,457 | 0,543 | 3,82 |
| 3,25 | 8,9894 | 0,273 | 0,727 | 3,67 |
| 2,74 | 9,0514 | 0,150 | 0,850 | 3,49 |
| 2,25 | 9,0925 | 0,068 | 0,932 | 3,39 |
| 1,79 | 9,1176 | 0,018 | 0,982 | 3,52 |
| 1,24 | 9,1267 | 0,000 | 1,000 | 4,94 |
| 1,00 | 9,1268 | 0,000 | 1,000 | # |

Values of the pH where the chemical shift is rapidly changing are: 2.74, 3.25, and 3.74 and the corresponding calculated p*Ka* values are: 3.49, 3.82 and 3.95. The average of this values is 3.81 and corresponds to the p*Ka* value students also determined graphically (3.41).

1. Titration curve (Figure S7)

**Figure S7.** Titration curve of Isoniazid.
